# Supplementary material for: Adoptively transferred Vγ9Vδ2 T cells show potent antitumor effects in a preclinical B cell lymphomagenesis model
Source: JCI journal article supplement (doi:10.1172/jci.insight.93179), 2017-07-05
Supplement: sd1 [file 1]

## Supplementary Figure 1

**A**



**B**



**Bisphosphonate-mediated expansion of Vδ2<sup>+</sup> T cells from PBMCs in vitro.** **A)** Flow cytometric analysis of Vδ2<sup>+</sup> T cell frequency after PBMCs were cultured for 2 weeks in the presence or absence of 2.5 μM of the FDA-approved bisphosphonate drug Zometa. **B)** Zometa dose-response curve.

## Supplementary Figure 2



**Flow cytometric analysis of U-251 transductants.** **A)** U-251 MG cells were stained with an antibody against human BTN3A1 (black line) or an isotype-matched negative control mAb (grey histogram). **B)** Flow cytometric analysis of the parental U-251 cells (left column) compared to U-251 cells retrovirally transduced with the indicated ligands.

### Supplementary Figure 3



**No effect on splenic B cell frequencies in mice administered *in vitro*-expanded  $\gamma\delta$  T cells.** EBV-infected mice that were injected with *in vitro*-expanded  $\gamma\delta$  T cells or vehicle were sacrificed 5-7 days later. Flow cytometric analysis of splenocytes revealed similar frequencies of human B cells in  $\gamma\delta$  T cell and vehicle-treated mice.

## Supplementary Figure 4



### No evidence of EBV peptide-specific responses by T cells from mice given *in vitro*-expanded $\gamma\delta$ T cells.

Splenocytes were harvested from EBV-infected mice that were injected with *in vitro* expanded  $\gamma\delta$  T cells or mock-treated (PBS). Normalized numbers of splenocytes were cultured in medium alone (no stimulation), or in medium containing the indicated concentration of synthetic EBV peptides, or 1  $\mu\text{g}/\text{ml}$  anti-CD3 mAb, and after 48 hours culture supernatants were analyzed for human IFN- $\gamma$  by a standardized ELISA. The plot shows means and standard deviations from four replicates.
